# Supplementary material for: Schwann cell-derived exosomes accelerate periodontal bone regeneration with osteogenesis, angiogenesis, and neurogenesis
Source: Royal Society of Chemistry journal article supplement (doi:10.1039/d4tb02601b), 2025-01-01
Supplement: d4tb02601b1.pdf [file d4tb02601b1.pdf]

# 1 Schwann cell-derived exosomes accelerate periodontal bone

## 2 regeneration with osteogenesis, angiogenesis, and neurogenesis

3 Ya Cui<sup>a1</sup>, Xiaojing Li<sup>a1</sup>, Xiaoya He<sup>a</sup>, Xingyu Zhou<sup>a</sup>, Xudong Wang<sup>a\*</sup>, Kaili Lin<sup>a\*</sup>, Lixia Mao<sup>a\*</sup>

4 <sup>a</sup>Department of Oral & Cranio-Maxillofacial Surgery, Shanghai Ninth People's Hospital, Shanghai Jiao Tong

5 University School of Medicine, Shanghai Key Laboratory of Stomatology, Shanghai Research Institute of

6 Stomatology, Shanghai, China

### 7 Supplemental Materials & Methods

8 **Figure S1.** The raw, unmodified scanning figures of western blot.

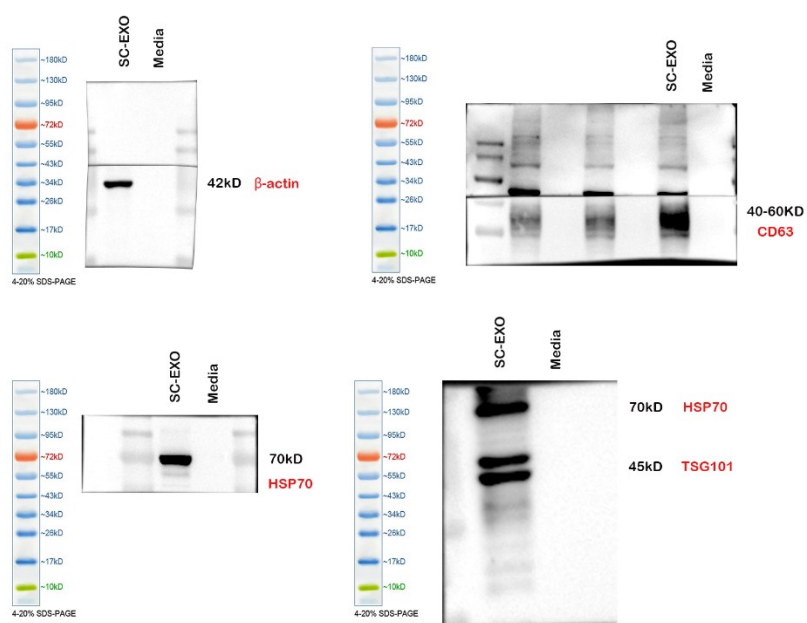

9

10

11 **Figure S2.** The raw, unmodified scanning figures of western blot.

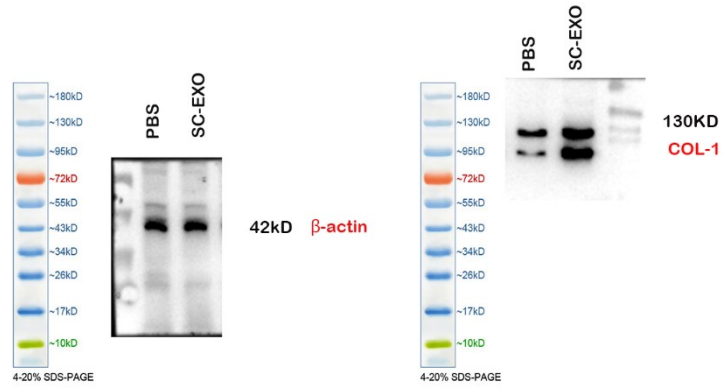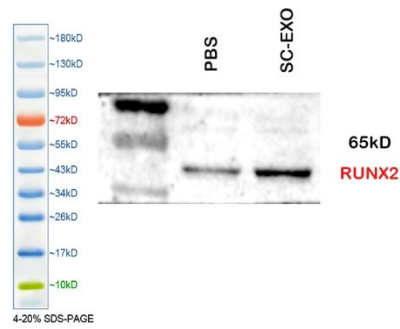

12

13

14 **Figure S3.** The raw, unmodified scanning figures of western blot.

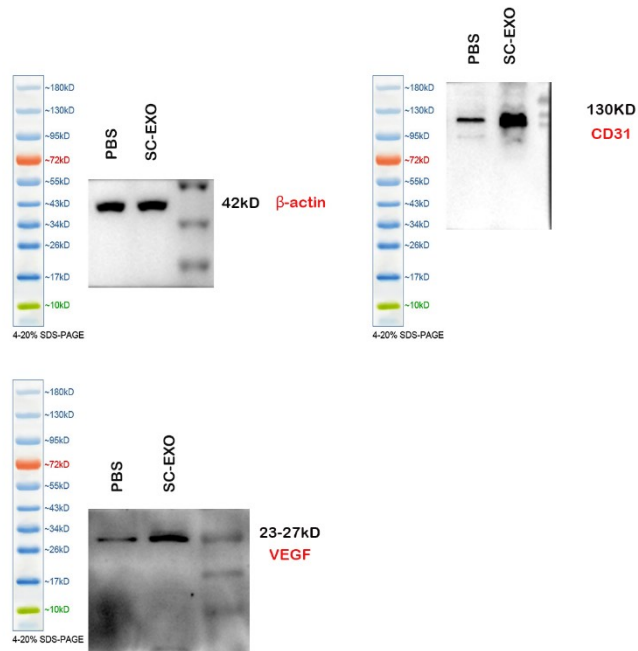

15

16 **Appendix Table 1. Primers used in this study**

| Gene         | Forward and reverse sequences (5'-3') |
|--------------|---------------------------------------|
| GAPDH-F      | CGCTCTCTGCTCCTCCTGTT                  |
| GAPDH-F      | CCATGGTGTCTGAGCGATGT                  |
| ALP-F        | GACCCTTGACCCCCACAAT                   |
| ALP-R        | GCTCGTACTGCATGTCCCCT                  |
| COL1-F (H)   | AGAACAGCGTGGCCT                       |
| COL1-R (H)   | TCCGGTGTGACTCGT                       |
| OCN-F (H)    | GGCAGCGAGGTAGTGAAGAG                  |
| OCN-R (H)    | GATGTGGTCAGCCAACCTCGT                 |
| RUNX-2-F (H) | GGAGTGGACGAGGCAAGAGTTT                |
| RUNX-2-R (H) | GGAGTGGACGAGGCAAGAGTTT                |
| RANKL-F (H)  | GGCTCATGGTTAGATCTGGC                  |
| RANKL-R (H)  | TGACCAATACTTGGTGCTTCC                 |
| OPG-F (H)    | TCAAGCAGGAGTGCAATCG                   |
| OPG-R (H)    | TCAAGCAGGAGTGCAATCG                   |

17 **Appendix Table 2. Antibodies used in this study**

| MARKER (SPECIES)       | DILUTION | DISTRIBUTOR/SOURCE |
|------------------------|----------|--------------------|
| Primary antibodies:    |          |                    |
| CD63 Rabbit mAb        | 1:1000   | Abcam, London, UK  |
| HSP70 Rabbit mAb       | 1:1000   | Abcam, London, UK  |
| Anti-TSG101 Rabbit mAb | 1:1000   | Abcam, London, UK  |

|                                         |        |                                    |
|-----------------------------------------|--------|------------------------------------|
| $\beta$ -actin Mouse mAb (4F2)          | 1:1000 | Abcam, London, UK                  |
| COL1A1 Rabbit mAb                       | 1:1000 | Abcam, London, UK                  |
| RUNX2 Rabbit mAb                        | 1:1000 | Cell Signaling, Massachusetts, USA |
| CD31 Rabbit mAb                         | 1:1000 | Abcam, London, UK                  |
| VEGF Rabbit mAb                         | 1:1000 | Abcam, London, UK                  |
| $\beta$ 3-Tubulin Rabbit mAb            | 1:500  | Abcam, London, UK                  |
| CGRP Rabbit mAb                         | 1:500  | Abcam, London, UK                  |
| Secondary antibodies:                   |        |                                    |
| Anti-mouse IgG HRP-linked Ab            | 1:1000 | Abcam, London, UK                  |
| Anti-rabbit IgG HRP-linked Ab           | 1:1000 | Abcam, London, UK                  |
| Anti-rabbit IgG (Alexa Fluor™ Plus 647) | 1:500  | Invitrogen, CA, USA                |
